# Supplementary material
Source: PubMed Central journal article supplement (PMC6766410)

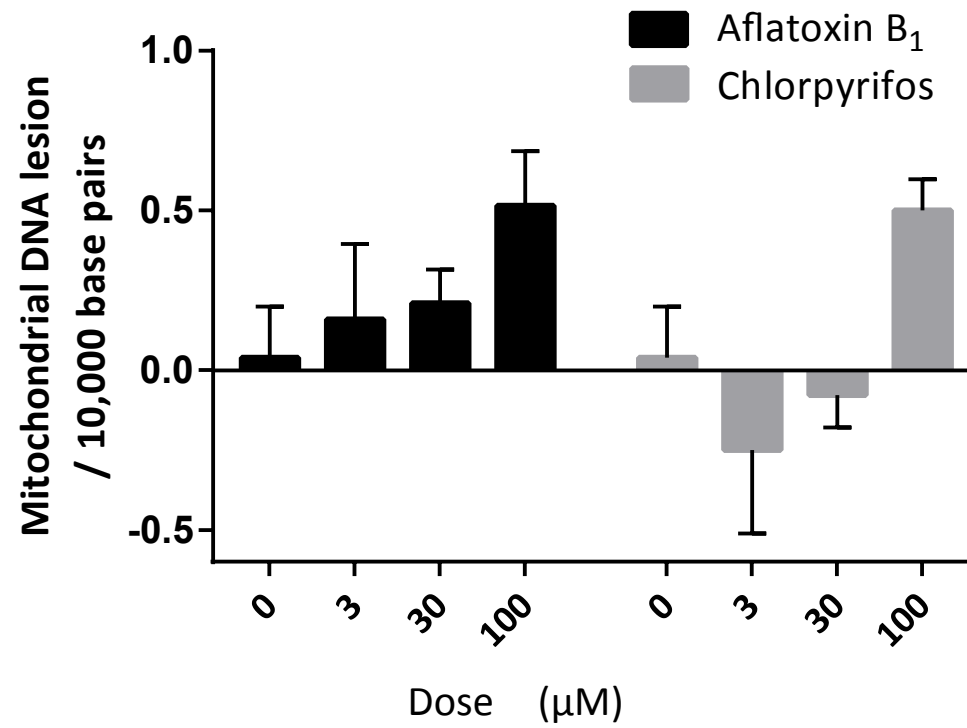

Supplemental Material. S4

Supplement: NIHMS1535671-supplement-4.pdf [file NIHMS1535671-supplement-4.pdf]
